# Supplementary material
Source: Springer Nature journal article supplement (https://www.springermedizin.de/resource/supplementary/12875_2010_539_MOESM1_ESM.pdf/9434906)
Supplement: MOESM1 [file 9434906]

## **Thematic analysis**

main qualities of the case reports

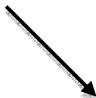

## **Structural analysis**

results regarding narrative elements in the case reports

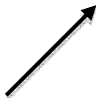

## **Synthesis**

### ***General qualities***

- striving towards neutrality
- biomedical framing

### ***Type of messages***

- a call for help
- a call for understanding
- hidden worries
- in my opinion
- appearing neutral
